# Supplementary material for: Ultrahigh photoresponse in strain- and domain-engineered large-scale MoS2 monolayer films
Source: Royal Society of Chemistry journal article supplement (doi:10.1039/d3ta00642e), 2023-01-01
Supplement: d3ta00642e1.pdf [file d3ta00642e1.pdf]

Supplementary Information

**Ultrahigh photoresponse in strain- and domain-engineered  
large-scale MoS<sub>2</sub> monolayer films**

Ye Seul Jung<sup>a</sup>, Jae Woo Park<sup>a,b</sup>, Ji Yeon Kim<sup>a</sup>, Youngseo Park<sup>c</sup>, Dong Gue Roe<sup>d</sup>,  
Junseok Heo<sup>c</sup>, Jeong Ho Cho<sup>e</sup>, and Yong Soo Cho<sup>a\*</sup>

<sup>a</sup>Department of Materials Science and Engineering, Yonsei University, Seoul 03722, Republic of Korea

<sup>b</sup>Samsung Electronics Co. Ltd., Gyeonggi-do 16677, Republic of Korea

<sup>c</sup>Department of Electrical and Computer Engineering, Ajou University, Suwon 16499, Republic of Korea

<sup>d</sup>School of Electrical and Electronic Engineering, Yonsei University, Seoul 03722, Republic of Korea

<sup>e</sup>Department of Chemical and Biomolecular Engineering, Yonsei University, Seoul 03722, Republic of Korea

\*E-mail: ycho@yonsei.ac.kr

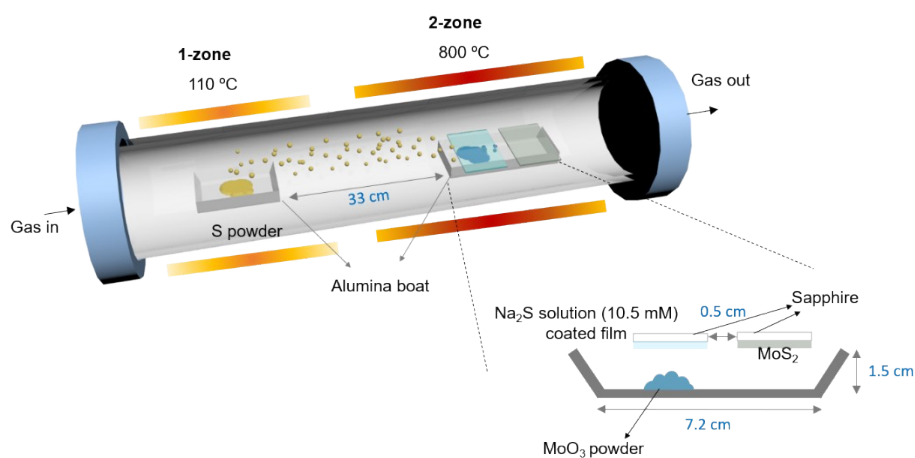

**Fig. S1** Schematic illustration of the  $\text{Na}_2\text{S}$ -assisted CVD process for synthesizing monolayer  $\text{MoS}_2$  thin films, which accommodates two heating zones for the evaporation of the sulfur source and the reaction of the TMD from a separate source of  $\text{MoO}_3$ . Detailed dimensions are provided in the cross-sectional schematic.

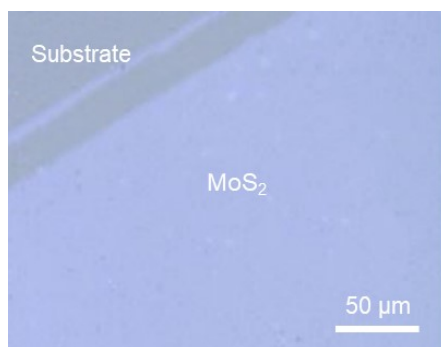

**Fig. S2** Optical microscopy image near the boundary of the synthesized  $\text{MoS}_2$  and sapphire substrate, indicating the uniform coverage of the film with no macroscale defects on the film surface.

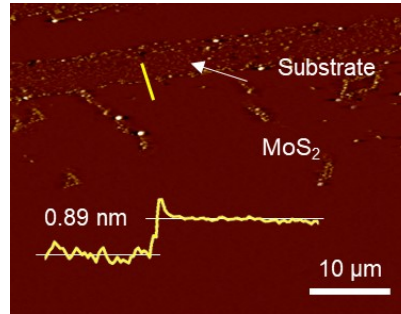

**Fig. S3** AFM surface image with the line profile across the boundary between MoS<sub>2</sub> and substrate, indicates that the film has a smooth surface with no topographical interruptions. The line profile across the film–substrate boundary shows a step height of  $\sim 0.89$  nm, indicating a monolayer.

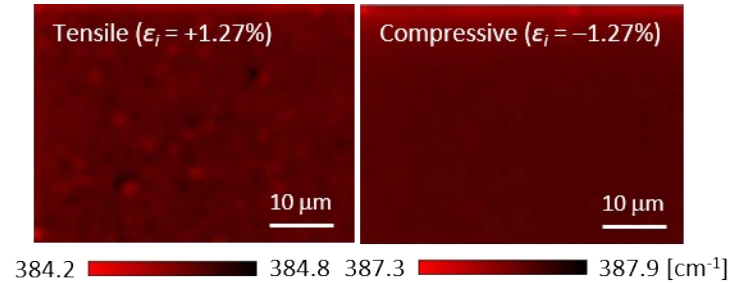

**Fig. S4** Raman mapping images of the  $E_{12g}^1$  vibrational mode for the MoS<sub>2</sub> monolayer processed with in situ strains of +1.27% (left) and  $-1.27\%$  (right) for the specific wavenumbers of 384.4 and 387.5  $\text{cm}^{-1}$ , respectively. This map indicates that the relevant vibrational peak modes are tightly distributed at  $\sim 384.4$   $\text{cm}^{-1}$  for  $\epsilon_i = +1.27\%$  and at  $\sim 387.5$   $\text{cm}^{-1}$  for  $\epsilon_i = -1.27\%$  over the entire scanned images, the contrast uniformity of which also suggests the homogeneous monolayer coverage. The different average wavenumbers of 384.4 and 387.5  $\text{cm}^{-1}$  imply a shift in the vibrational peak position depending on the presence of different levels of lattice strain.

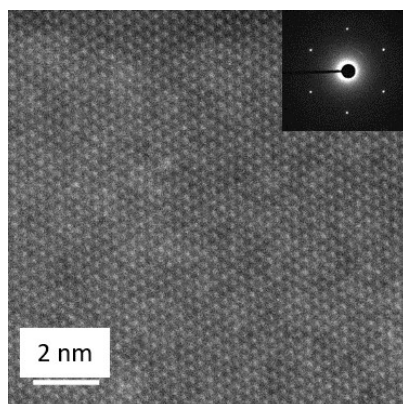

**Fig. S5** HAADF-STEM image of the monolayer sample of large-scale MoS<sub>2</sub> monolayer film synthesized on a sapphire substrate (inset: FFT-SAED pattern).

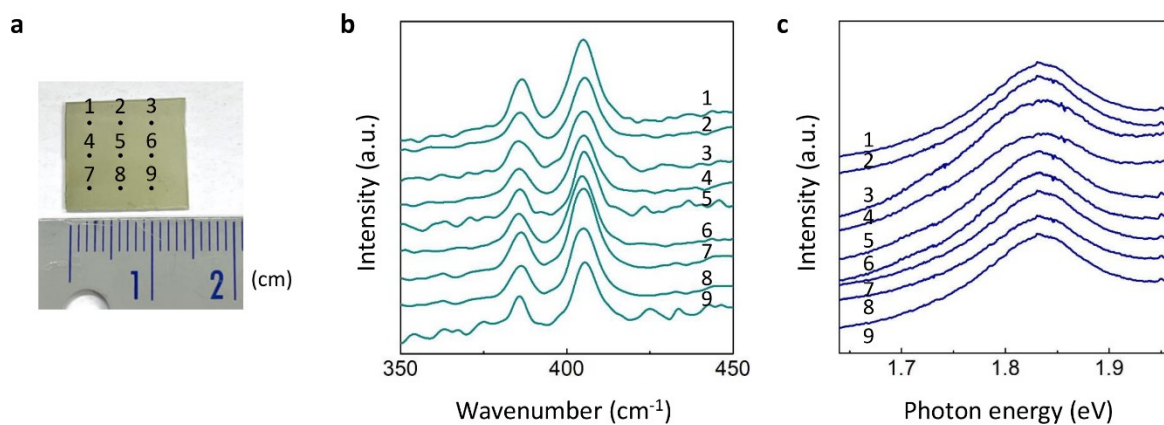

**Fig. S6** (a) Photograph of a large-scale MoS<sub>2</sub> monolayer film synthesized on a sapphire substrate. (b) Raman spectra, and (c) PL spectra from the nine different positions in (a), indicating quite consistent spectra patterns at the different spots.

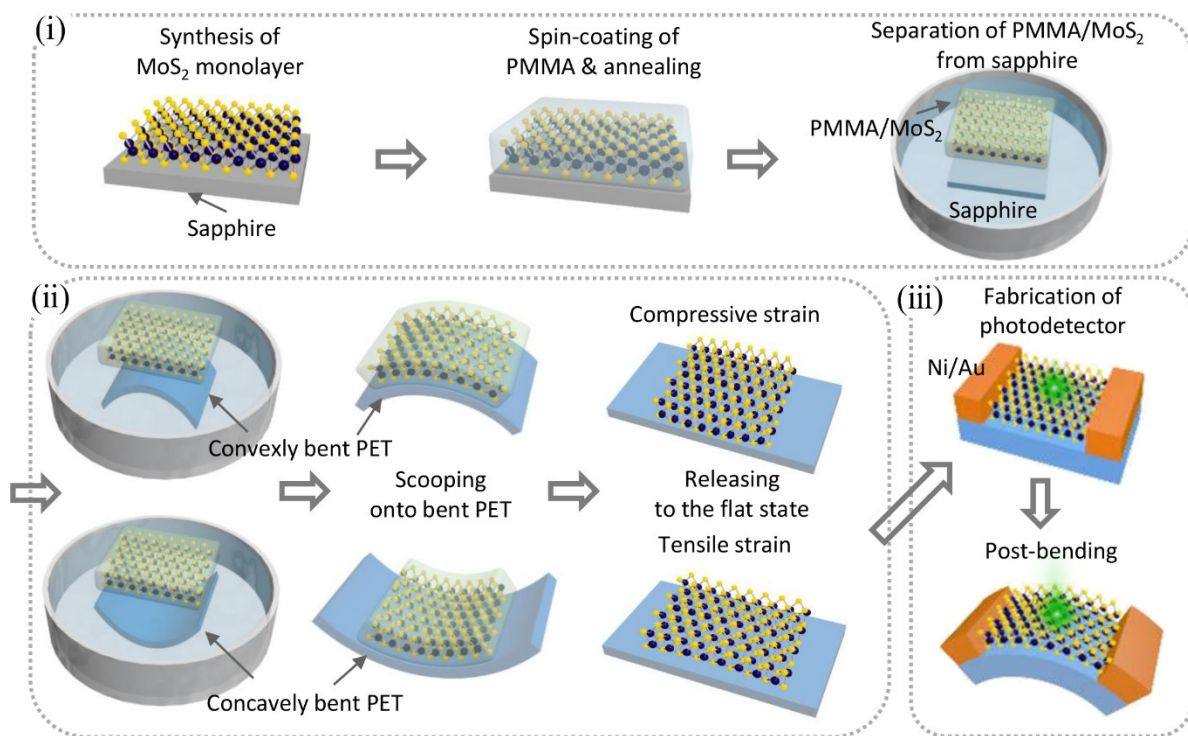

**Fig. S7** Schematic illustration of the double-strain engineering of large-scale MoS<sub>2</sub> monolayer films: (i) the LPCVD synthesis of a large-scale MoS<sub>2</sub> monolayer film, (ii) transferring the MoS<sub>2</sub> film onto concavely or convexly pre-bent PET substrate for the first strain engineering with  $\pm 1.27\%$  strain, and (iii) post-bending the pre-bent sample for the second strain engineering up to  $+2.54\%$ .

## Note: Estimation of the in situ strain

The following two steps were used to estimate the in situ bending strain applied for the monolayer MoS<sub>2</sub>/PET sample.

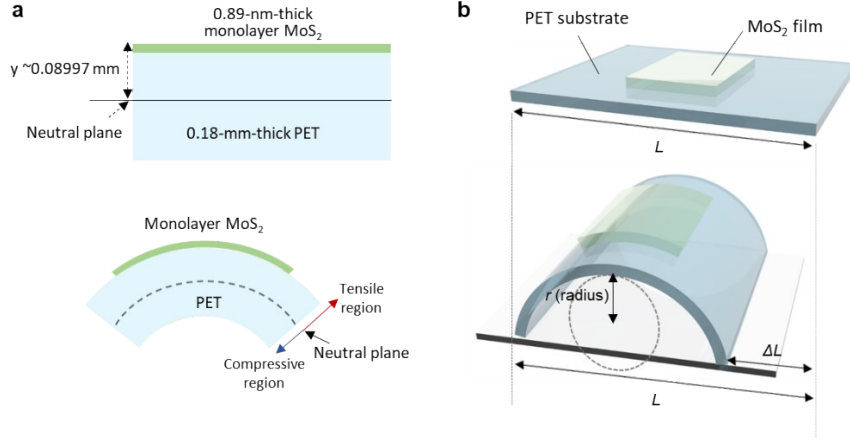

**Fig. S8** (a) Schematic of the MoS<sub>2</sub>/PET structure used for the in situ process with the location of neutral plane and (b) schematic illustration of the bent substrate with defined dimensional parameters.

### 1) Estimation of the neutral plane

The location of the neutral plane,  $y$ , relative to the top surface was calculated for the MoS<sub>2</sub>/PET structure by considering the contribution of each layer using the following equation reported for a multi-layered structure (*Science* **325**, 977-981 (2009)):

$$y = \frac{E_{MoS_2}^* t_{MoS_2} \left( t_{MoS_2} - \frac{t_{MoS_2}}{2} \right) + E_{PET}^* t_{PET} \left( t_{MoS_2} + t_{PET} - \frac{t_{PET}}{2} \right)}{E_{MoS_2}^* t_{MoS_2} + E_{PET}^* t_{PET}}$$

where  $E^* = E/(1-\nu^2)$  (here,  $E$  and  $\nu$  are the Young's modulus and Poisson's ratio of the layer, respectively), and  $t$  is the thickness of the layer.

The following data were used for the calculation:

$E_{MoS_2} = 262$  GPa,  $\nu_{MoS_2} = 0.3$  for the 0.89-nm-thick MoS<sub>2</sub> monolayer (*2D Mater.* **1** (2014) 011007)

$E_{PET} = 3.1$  GPa,  $\nu_{PET} = 0.43$  for the 0.18-mm-thick PET substrate (*Materials* **9** (2016) 850, *Rev. Sci. Instrum.* **73**, (2022) 1813)

The neutral plane  $y$  was found to be 0.08997 mm.

### 2) Calculation of the bending strain in the harvester

The level of strain was changed by adjusting the curvature of the loaded polymer substrate. The bending curvature radius  $r$  was calculated by the following equation (*Mater. Horiz.*, **9** (2022) 1207-1215):

$$r = \frac{L}{2\pi \sqrt{\frac{\Delta L}{L} - \frac{\pi^2 t^2}{12L^2}}}$$

where  $L$  is the substrate length,  $\Delta L$  is the reduced length after bending (on the bottom horizontal line) and  $t$  is the total thickness of the MoS<sub>2</sub> film and substrate.

The in situ strain  $\varepsilon_i$  applied in the monolayer MoS<sub>2</sub> layer was calculated using the relation  $\varepsilon_i = (y-x)/r$ , where  $x$  is the distance from the top of the photodetector to the middle of the MoS<sub>2</sub> layer, and  $r$  is the radius of the bending curvature. The subsequent bending strain values were finally attained with respect to the magnitude of the bending curvature. As a result, the bending with the radius of curvatures of 37.0, 17.4, 10.0 and 7.1 mm were estimated to create the in situ strains of 0.24, 0.52, 0.90 and 1.27%, respectively.

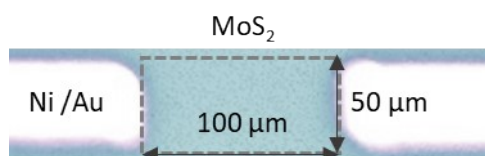

**Fig. S9** Optical image of the channel between the Ni/Au electrodes in a monolayer MoS<sub>2</sub> photodetector, showing an active area of  $\sim 100 \mu\text{m} \times \sim 50 \mu\text{m}$ .

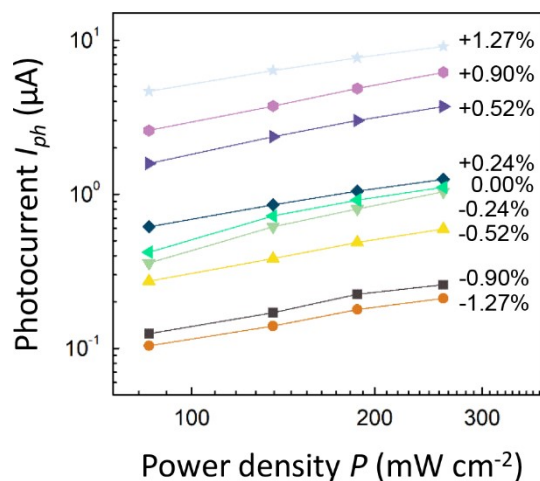

**Fig. S10** Variations in the photocurrent  $I_{ph}$  with increasing  $P$  measured at +5 V for the MoS<sub>2</sub>-monolayer-based photodetectors processed with various levels of in situ compressive and tensile strain  $\varepsilon_i$ .



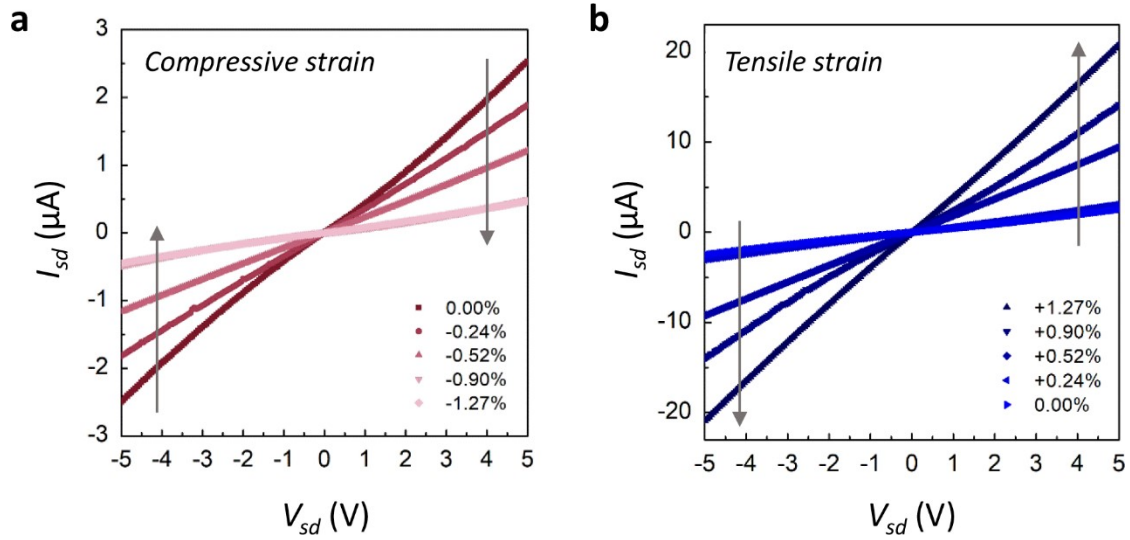

**Fig. S11**  $I_{sd}$ - $V_{sd}$  curves of the MoS<sub>2</sub>-monolayer-based photodetectors processed with in situ (a) compressive and (b) tensile strain  $\varepsilon_i$ , which were measured at the laser power density  $P$  of 259 mW cm<sup>-2</sup>.

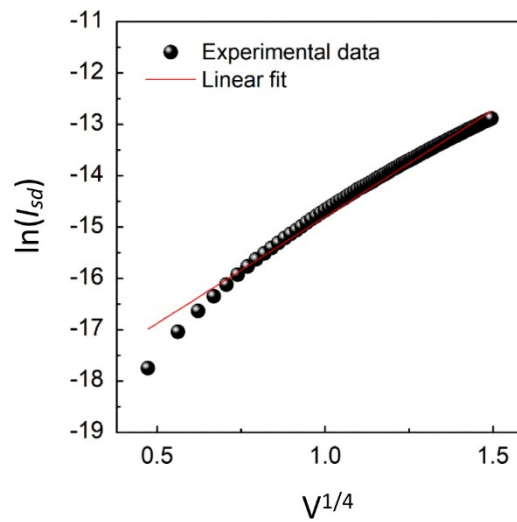

**Fig. S12** Plot of  $\ln(I_{sd})$  versus  $V_{sd}^{1/4}$  for the MoS<sub>2</sub>-based photodetector, indicating the conduction mechanism of the thermionic emission-diffusion, as assumed from the well-fitted line.

**Table S1** Comparison of the response times of photodetectors based on MoS<sub>2</sub> monolayers; here,  $V_{sd}$  is the source–drain voltage, and  $V_g$  is the gate voltage.

| Substrate            | Method      | Wavelength of the incident laser [nm] | $V_{sd}$ [V] | $V_g$ [V] | Rise time [s]/ Fall time [s] | Ref.      |
|----------------------|-------------|---------------------------------------|--------------|-----------|------------------------------|-----------|
| SiO <sub>2</sub> /Si | CVD         | 532                                   | 1            | 100       | 3/500                        | 1         |
| SiO <sub>2</sub> /Si | Exfoliation | 561                                   | 8            | -70       | 4/9                          | 2         |
| SiO <sub>2</sub> /Si | Exfoliation | 550                                   | 1            | 0         | 0.05/0.05                    | 3         |
| PI/PET               | CVD         | 450                                   | 0.1–1        | 0         | 1.6/0.7                      | 4         |
| sapphire             | CVD         | 532                                   | 0.5          | 0         | 36.7/56.9                    | 5         |
| SiO <sub>2</sub> /Si | CVD         | 532                                   | -            | -         | 78/25                        | 6         |
| SiO <sub>2</sub> /Si | CVD         | 365                                   | 1            | 0         | 2.04/6.64                    | 7         |
| PEN                  | CVD         | white                                 | 1            | 0         | 30.9/24.8                    | 8         |
| PET                  | CVD         | 520                                   | 10           | 0         | 0.050/0.279                  | This work |

(PI: polyimide, PET: polyethylene terephthalate, PEN: polyethylene naphthalate)

**References cited in Table S1**

- [1] W. Zhang, J. Huang, C. Chen, Y. Chang, Y. Cheng, L. Li, *Adv. Mater.* **2013**, 25, 3456.  
 [2] O. Lopez-Sanchez, D. Lembke, M. Kayci, A. Radenovic, A. Kis, *Nat. Nanotechnol.* **2013**, 8, 497.  
 [3] Z. Yin, H. Li, H. Li, L. Jiang, Y. Shi, Y. Sun, G. Lu, Q. Zhang, X. Chen, H. Zhang, *ACS Nano* **2012**, 6, 74.  
 [4] S. Pak, A. Jang, J. Lee, J. Hong, P. Giraud, S. Lee, Y. Cho, G. An, Y. Lee, H. S. Shin, S. M. Morris, S. Cha, J. I. Sohn, J. M. Kim, *Nanoscale* **2019**, 11, 4726.  
 [5] Y. H. Zhou, H. N. An, C. Gao, Z. Q. Zheng, B. Wang, *Mater. Lett.* **2019**, 237, 298.  
 [6] Y. Huang, F. Zhuge, J. Hou, L. Lv, P. Luo, N. Zhou, L. Gan, T. Zhai, *ACS Nano* **2018**, 12, 4062.  
 [7] L. Zhao, K. Chen, F. Yang, M. Zheng, J. Guo, G. Gu, B. Zhang, H. Qin, G. Cheng, Z. Du, *Nano Energy* **2019**, 62, 38.  
 [8] F. Li, T. Shen, L. Xu, C. Hu, J. Qi, *Adv. Electron. Mater.* **2019**, 5, 1900803.

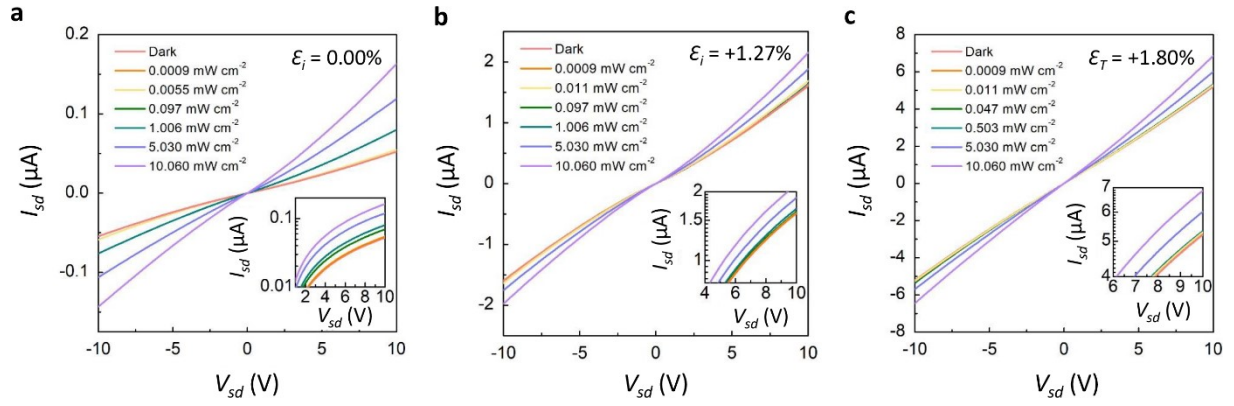

**Fig. S13**  $I_{sd}$ - $V_{sd}$  curves of the monolayer MoS<sub>2</sub> photodetectors processed with (a) no strain, (b) in situ strain of +1.27%, and (c) double strain of +1.80% at different power densities.

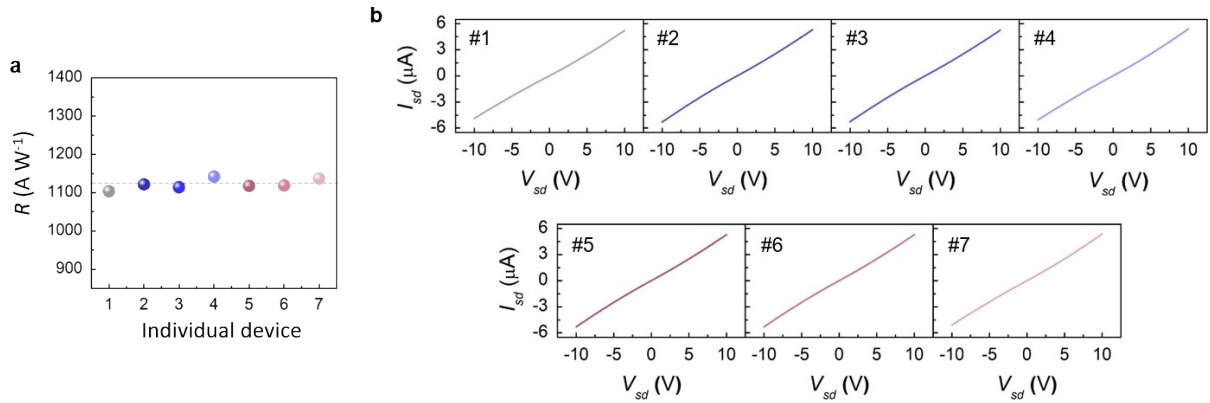

**Fig. S14** (a) Plot of  $R$  values obtained by seven different measurements in the optimal conditions of applied strain and power density for monolayer MoS<sub>2</sub> photodetectors and (b) the corresponding individual  $I_{sd}$ - $V_{sd}$  curves of the measurements.

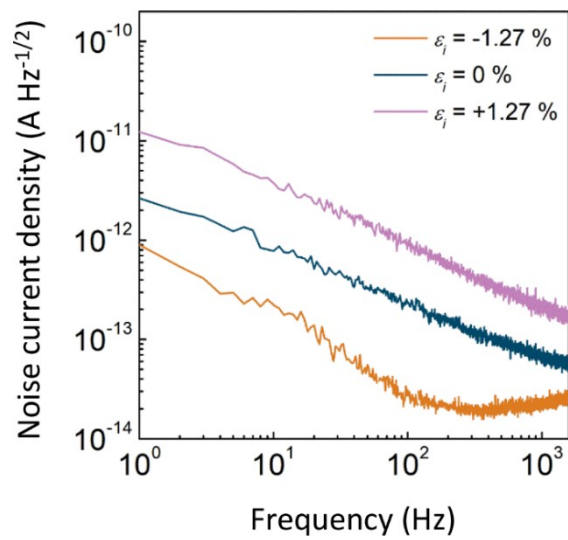

**Fig. S15** Spectral noise current density as a function of frequency for the MoS<sub>2</sub> photodetectors processed with in situ strains of -1.27%, 0%, and +1.27%

**Table S2.** Reported detectivity  $D^*$  values in 2D material-based photodetectors, which was measured with the consideration of noise current.

| Material                                    | Substrate                          | Type of 2D materials (Thickness [nm]) | Wavelength [nm] | Frequency [Hz] | Noise current [A Hz <sup>-1/2</sup> ] | $D^*$ [Jones]           | Ref.             |
|---------------------------------------------|------------------------------------|---------------------------------------|-----------------|----------------|---------------------------------------|-------------------------|------------------|
| MoS <sub>2</sub>                            | SiO <sub>2</sub> /Si               | Monolayer (N/A)                       | 635             | N/A            | ~10 <sup>-12</sup>                    | 7.7 × 10 <sup>11</sup>  | 1                |
| MoSe <sub>2</sub>                           |                                    | Nanosheet (N/A)                       |                 | N/A            | ~10 <sup>-9</sup>                     | 1.0 × 10 <sup>11</sup>  |                  |
| PdSe <sub>2</sub>                           | SiO <sub>2</sub> /Si               | Nanosheet (6)                         | 1060            | N/A            | N/A                                   | 1.31 × 10 <sup>9</sup>  | 2                |
| black-AsP                                   | SiO <sub>2</sub> /Si               | Nanosheet (5~20)                      | ~2300           | N/A            | ~10 <sup>-13</sup>                    | ~2.0 × 10 <sup>8</sup>  | 3                |
| Te                                          | Al <sub>2</sub> O <sub>3</sub> /Si | Nanosheet (18.8)                      | 1700            | 1000           | ~10 <sup>-10</sup>                    | 2 × 10 <sup>9</sup>     | 4                |
| MoS <sub>2</sub> / WS <sub>2</sub>          | SiO <sub>2</sub> /Si               | Monolayer/ Monolayer (0.95/0.7)       | 405             | N/A            | ~10 <sup>-12</sup>                    | 7.17 × 10 <sup>11</sup> | 5                |
| MoS <sub>2</sub> ( $\epsilon_i = 0.00\%$ )  | PET                                | Monolayer (~1)                        | 532             | 1600           | 7.00 × 10 <sup>-14</sup>              | 8.9 × 10 <sup>11</sup>  | <i>This work</i> |
| MoS <sub>2</sub> ( $\epsilon_i = +1.27\%$ ) |                                    |                                       |                 |                | 2.05 × 10 <sup>-13</sup>              | 9.1 × 10 <sup>12</sup>  |                  |

\* PET; polyethylene terephthalate

- [1] D. Kufer, G. Konstantatos, *Nano Lett.* 2015, **15**, 7307.  
 [2] Q. Liang, Q. Wang, Q. Zhang, J. Wei, S. X. Lim, R. Zhu, J. Hu, W. Wei, C. Lee, C. Sow, W. Zhang, A. T. S. Wee, *Adv. Mater.* 2019, **31**, 1807609.  
 [3] M. Long, A. Gao, P. Wang, H. Xia, C. Ott, C. Pan, Y. Fu, E. Liu, X. Chen, W. Lu, T. Nilges, J. Xu, X. Wang, W. Hu, F. Miao, *Sci. Adv.* 2017, **3**, e1700589.  
 [4] M. Amani, C. Tan, G. Zhang, C. Zhao, J. Bullock, X. Song, H. Kim, V. R. Shrestha, Y. Gao, K. B. Crozier, M. Scott, A. Javey, *ACS Nano* 2018, **12**, 7253.  
 [5] C. Li, J. Zhu, W. Du, Y. Huang, H. Xu, Z. Zhai and G. Zou, *Nanoscale Res. Lett.*, 2021, **16**, 123.

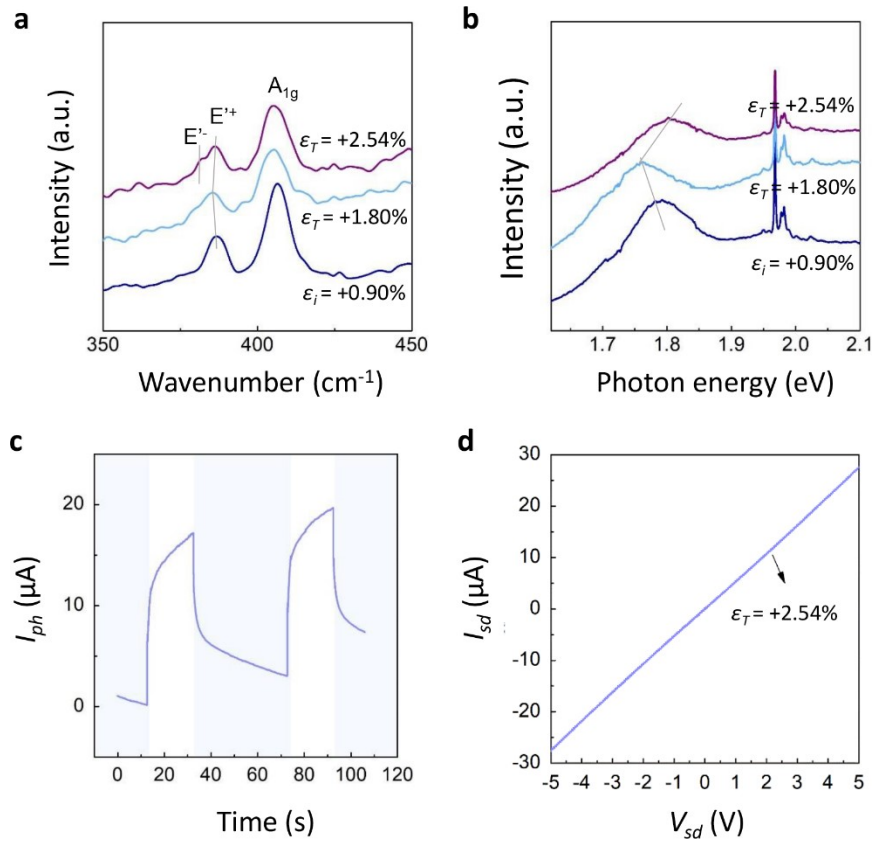

**Fig. S16** Comparisons of the (a) Raman and (b) PL spectra of the double-strained MoS<sub>2</sub> films having the total strains of +2.54% and +1.80% with those of the in situ strained sample ( $\epsilon_i \sim +0.9\%$ ), (c) the transient on/off switching behavior of the +2.54%-strained photodetector, and (d) the  $I_{sd}$ - $V_{sd}$  curve of the +2.54%-strained photodetector.

**Table S3** Performance comparison of visible-light photodetectors based on 2D materials with no applied gate voltage. Here,  $A$  is the active area,  $V_{sd}$  is the source–drain voltage,  $I_{ph}$  is the photocurrent,  $P$  is the light power density, and  $R$  is the photoresponsivity.

| Material                                    | Method             | Type (Thickness [nm]) | $A$ [ $\mu\text{m}^2$ ] | Substrate            | Wavelength of the incident laser [nm] | $V_{sd}$ [V] | $I_{ph}$ [ $\mu\text{A}$ ] | $P$ [ $\text{mW cm}^{-2}$ ] | $R$ [ $\text{A W}^{-1}$ ] | Ref.             |
|---------------------------------------------|--------------------|-----------------------|-------------------------|----------------------|---------------------------------------|--------------|----------------------------|-----------------------------|---------------------------|------------------|
| MoS <sub>2</sub>                            | Exfoliation        | Monolayer (0.8)       | 5.46                    | SiO <sub>2</sub> /Si | 550                                   | −7           | 0.0035                     | 80 $\mu\text{W}$            | 0.001                     | 55               |
| MoSe <sub>2</sub>                           | CVD                | Monolayer (0.71)      | 446                     | SiO <sub>2</sub> /Si | 532                                   | 10           | 0.00181                    | 100                         | 0.013                     | 56               |
| MoSe <sub>2</sub>                           | CVD                | Monolayer (0.7)       | -                       | SiO <sub>2</sub> /Si | 532,650                               | −1           | 0.0015                     | 590                         | 0.00026                   | 57               |
| WS <sub>2</sub>                             | CVD                | Monolayer (-)         | -                       | SiO <sub>2</sub> /Si | 532                                   | -            | 0.00012                    | -                           | 0.0188                    | 58               |
| WS <sub>2</sub>                             | CVD                | Monolayer (0.8)       | -                       | SiO <sub>2</sub> /Si | 500                                   | 1            | 0.045                      | 0.2                         | 3.07                      | 59               |
| WS <sub>2</sub>                             | CVD                | Monolayer (0.8)       | 25                      | SiO <sub>2</sub> /Si | 532                                   | 4            | 10                         | 10                          | 20                        | 60               |
| WSe <sub>2</sub>                            | CVD                | Monolayer (0.746)     | 100                     | SiO <sub>2</sub> /Si | 532                                   | −1           | 0.03                       | 25                          | 1.1                       | 61               |
| ReSe <sub>2</sub>                           | Exfoliation        | Monolayer (0.66)      | 4                       | SiO <sub>2</sub> /Si | 633                                   | −0.5         | 0.08                       | -                           | -                         | 62               |
| In <sub>2</sub> Se <sub>3</sub>             | PVD                | Monolayer (~1.2)      | 1.1                     | SiO <sub>2</sub> /Si | 532                                   | −2           | 0.0045                     | 0.026                       | 340                       | 63               |
| GeS                                         | Solution synthesis | Multilayer (160)      | 2                       | SiO <sub>2</sub> /Si | 405                                   | 3            | 0.0037                     | 1.98                        | 173                       | 64               |
| GeSe                                        | PVD                | Multilayer (15)       | 6                       | SiO <sub>2</sub> /Si | 633                                   | −1.5         | 0.006                      | 210.8                       | 7.05                      | 65               |
| GeP                                         | Exfoliation        | Multilayer (4.3)      | 2.52                    | SiO <sub>2</sub> /Si | 532                                   | −0.1         | ~0.001                     | 0.32                        | 3.11                      | 66               |
| SnS                                         | CVD                | Multilayer (25)       | 12.6                    | SiO <sub>2</sub> /Si | 532                                   | −1           | 1.5                        | 300                         | 21.8                      | 67               |
| SnS <sub>2</sub>                            | CVD                | Multilayer (108)      | 75                      | mica                 | 450                                   | 10           | ~0.04                      | 1                           | 2                         | 68               |
| SnSe                                        | Sputtering         | Multilayer (~15)      | 2000                    | SiO <sub>2</sub> /Si | 404                                   | 15           | 1.52                       | 0.008                       | 277.3                     | 69               |
| SnSe <sub>2</sub>                           | CVD                | Multilayer (3)        | 10                      | SiO <sub>2</sub> /Si | 530                                   | 3            | 1.3                        | 6.38                        | 1100                      | 70               |
| PbI <sub>2</sub>                            | PVD                | Multilayer (8.32)     | -                       | PET                  | 450                                   | 5            | 0.014                      | 42.24                       | 131.7                     | 71               |
| CdS <sub>x</sub> Se <sub>(1-x)</sub>        | CVD                | Multilayer (76)       | 36                      | mica                 | 450                                   | 5            | 1.62                       | 0.56                        | 703                       | 72               |
| MoS <sub>2</sub> ( $\epsilon_T = +1.80\%$ ) | CVD                | Monolayer (1.06)      | 5000                    | PET                  | 532                                   | ~10          | ~22.9                      | 0.0009                      | 1140                      | <i>This work</i> |

(PET: polyethylene terephthalate, CVD: chemical vapor deposition, PVD: physical vapor deposition)

**Table S4** Performance comparison of flexible photodetectors based on 2D materials. Here,  $V_{sd}$  is the source–drain voltage,  $P$  is the light power density, and  $R$  is the photoresponsivity.

| Materials                                           | Method              | Type or thickness [nm] | Substrate | Wavelength of the incident laser [nm] | $V_{sd}$ [V]                | $P$ [mW cm <sup>-2</sup> ] | $R$ [A W <sup>-1</sup> ] | Bending cycles | Ref.             |
|-----------------------------------------------------|---------------------|------------------------|-----------|---------------------------------------|-----------------------------|----------------------------|--------------------------|----------------|------------------|
| GaS                                                 | CVD                 | ~3 layers              | PET       | 254                                   | 2                           | 0.5                        | 19.2                     | -              | 73               |
| GaSe                                                | CVD                 | ~5 layers              | mica      | white                                 | 10                          | 3.27                       | 0.03                     | -              | 74               |
| GaTe                                                | CVD                 | 80                     | PET       | 473                                   | 5                           | 3.36                       | 0.03                     | 200            | 75               |
| InSe                                                | Exfoliation         | ~12                    | PET       | 633                                   | -10                         | ~1                         | 3.9                      | -              | 76               |
| WSe <sub>2</sub>                                    | PLD                 | 48                     | PI        | 635                                   | 10                          | 0.0067                     | 0.92                     | -              | 77               |
| In <sub>2</sub> Se <sub>3</sub>                     | PLD                 | 22.9                   | PI        | 532–635                               | -5                          | 0.027                      | 22.96                    | -              | 78               |
| SnS                                                 | PLD                 | 15                     | PI        | 370                                   | 5                           | 0.03                       | 115                      | 100            | 79               |
| Bi <sub>2</sub> Se <sub>3</sub>                     | PVD                 | ~27                    | mica      | 735                                   | 0.1                         | 26.7                       | 0.0101                   | 200            | 80               |
| HfS <sub>2</sub> /h-BN                              | CVD                 | Monolayer              | PET       | 450                                   | 10                          | 3.3                        | 0.135                    | 100            | 81               |
| Pb <sub>1-x</sub> Sn <sub>x</sub> Se                | CVD                 | 15–45                  | mica      | 473                                   | 2                           | 5.1                        | 5.95                     | 100            | 82               |
| PbI <sub>2</sub>                                    | PVD                 | 8.32                   | PET       | 450                                   | 5                           | 42.24                      | 147.6                    | 100            | 71               |
| SnTe                                                | PVD                 | 120                    | PET       | 635                                   | 1                           | ~12 mW                     | 49.03                    | 80             | 83               |
| Graphene/<br>MoS <sub>2</sub>                       | CVD                 | Monolayer              | PET       | 632.8                                 | -0.1                        | 0.645 μW                   | 10                       | 1000           | 84               |
| V <sub>2</sub> O <sub>5</sub> /<br>MoS <sub>2</sub> | Hydrothermal method | ~4 layers              | Al foil   | 554                                   | 1                           | 4.1                        | 0.0651                   | 500            | 85               |
| MoS <sub>2</sub>                                    | CVD                 | Monolayer              | PET       | 532                                   | -10                         | ~5                         | 9                        | -              | 86               |
| MoS <sub>2</sub>                                    | CVD                 | Monolayer              | PEN       | 405                                   | -10<br>(V <sub>g</sub> 80V) | 5.73                       | 0.02                     | 1000           | 87               |
| MoS <sub>2</sub>                                    | CVD                 | ~6                     | PET       | 532                                   | 10                          | 0.015 mW                   | 0.0002                   | 20             | 88               |
| MoS <sub>2</sub><br>( $\epsilon_T = +1.80\%$ )      | CVD                 | Monolayer              | PET       | 520–532                               | 10                          | 0.0009                     | 1140                     | 10000          | <i>This work</i> |

(PEN: polyethylene naphthalate, PET: polyethylene terephthalate, PI: polyimide, CVD: chemical vapor deposition, PLD: pulsed laser deposition, PVD: physical vapor deposition)
